# Supplementary material
Source: PubMed Central journal article supplement (PMC5166973)
Supplement: NIHMS63345-supplement-Supplementary_figure_7.pdf [file NIHMS63345-supplement-Supplementary_figure_7.pdf]

**A**

APC<sup>flox</sup>

Vehicle

BEZ235

Silvestrol

WT

WT Vehicle

WT Silvestrol

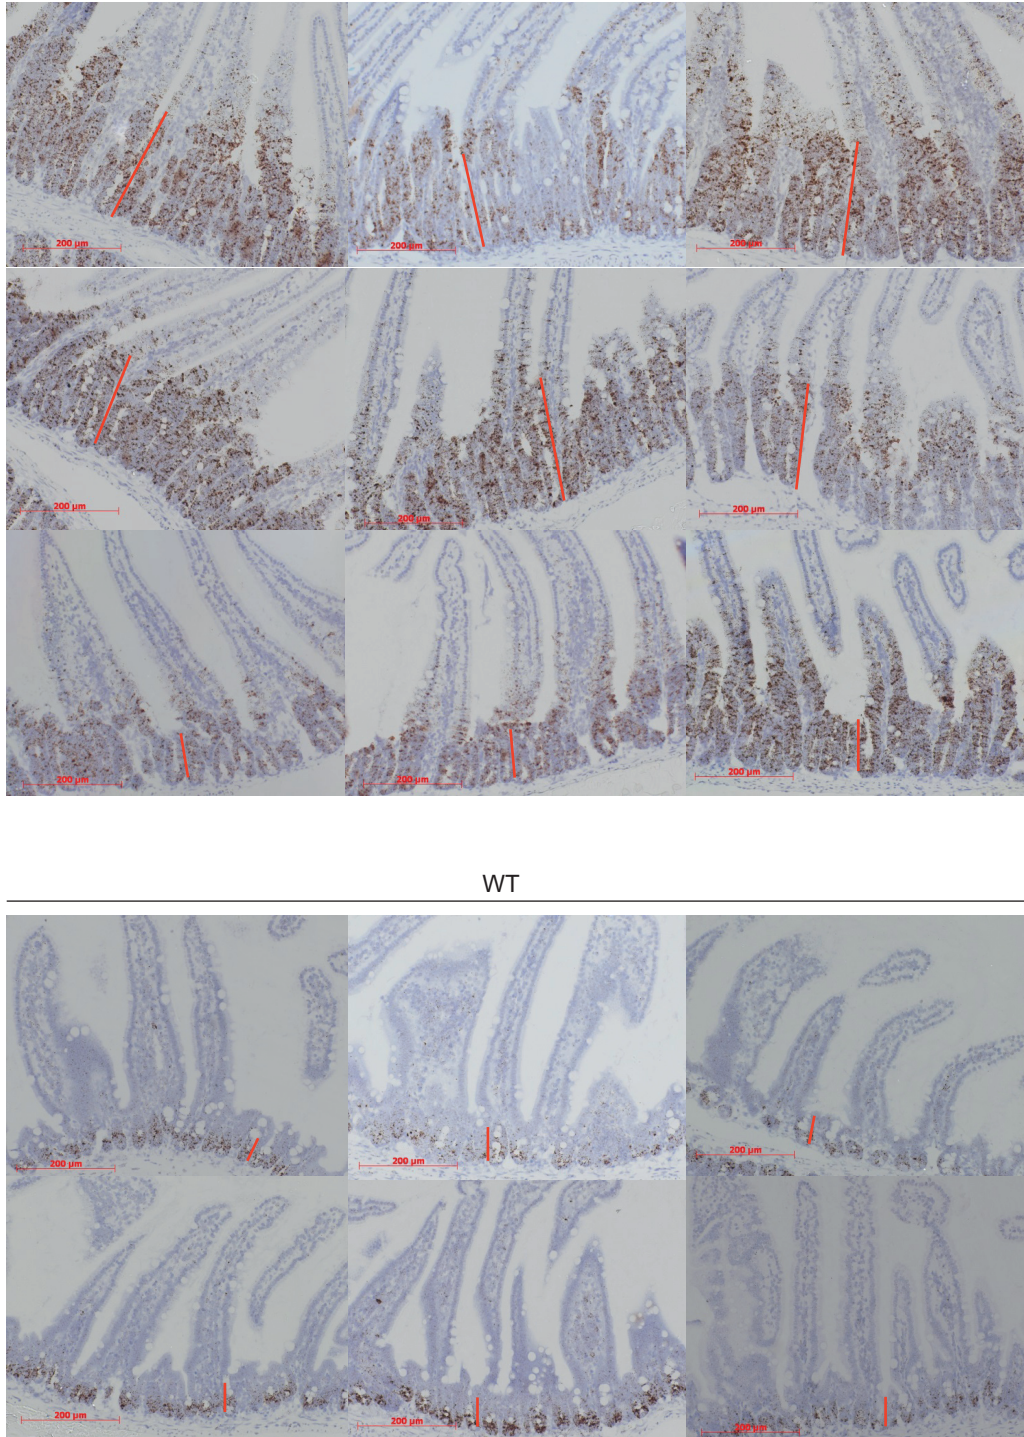

**B**

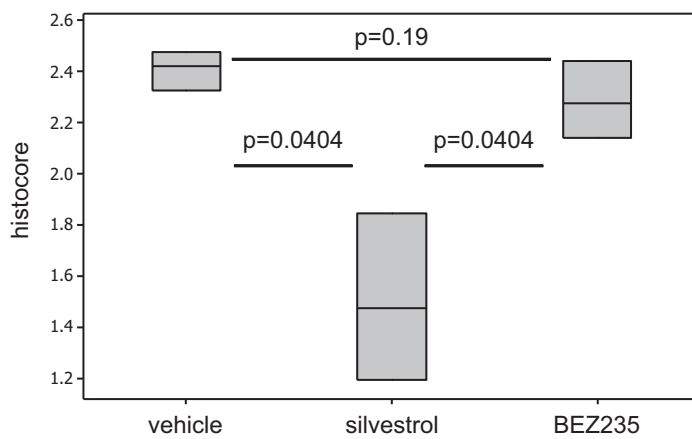

0 = no stain  
 1 = weak stain  
 2 = moderate stain  
 3 = strong stain
