# Supplementary material
Source: PubMed Central journal article supplement (PMC5166973)

**A**

|         | SW480 | SW480 +BEZ235 | SW620 | SW620 +BEZ235 | HCT116 | HCT116 FBXW7-/- |
|---------|-------|---------------|-------|---------------|--------|-----------------|
| MYC     | 41    | 40            | 43    | 46            | ~60    | 140             |
| pT58MYC | 51    | 63            | 70    | 44            | ~87    | 142             |

**B**

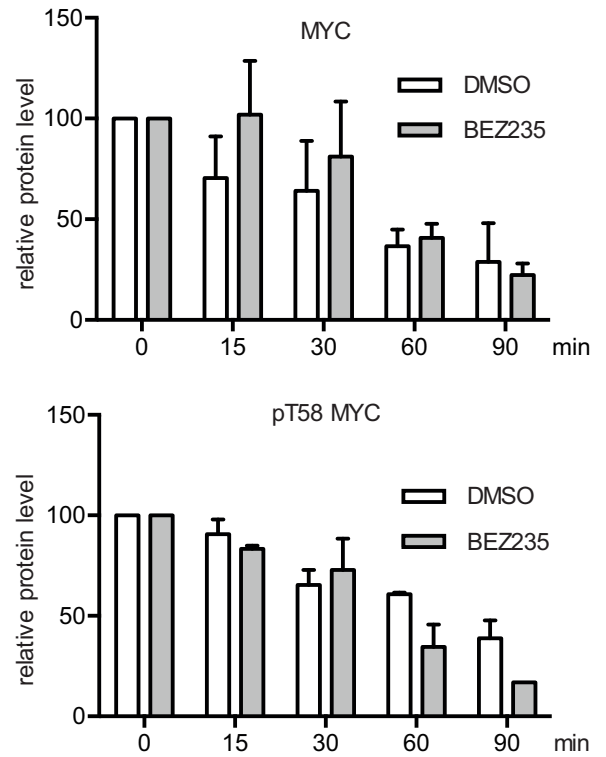

**C**

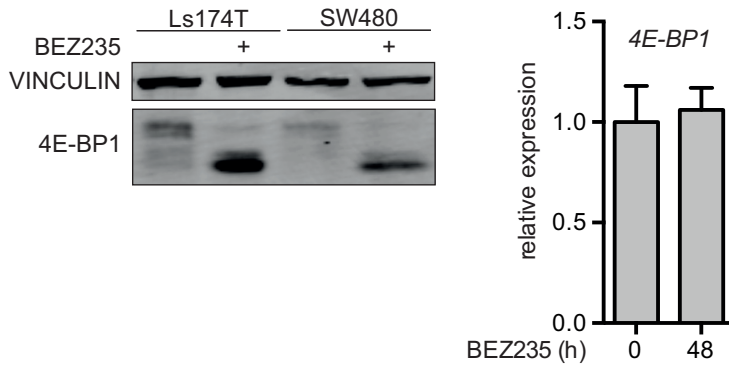

**D**

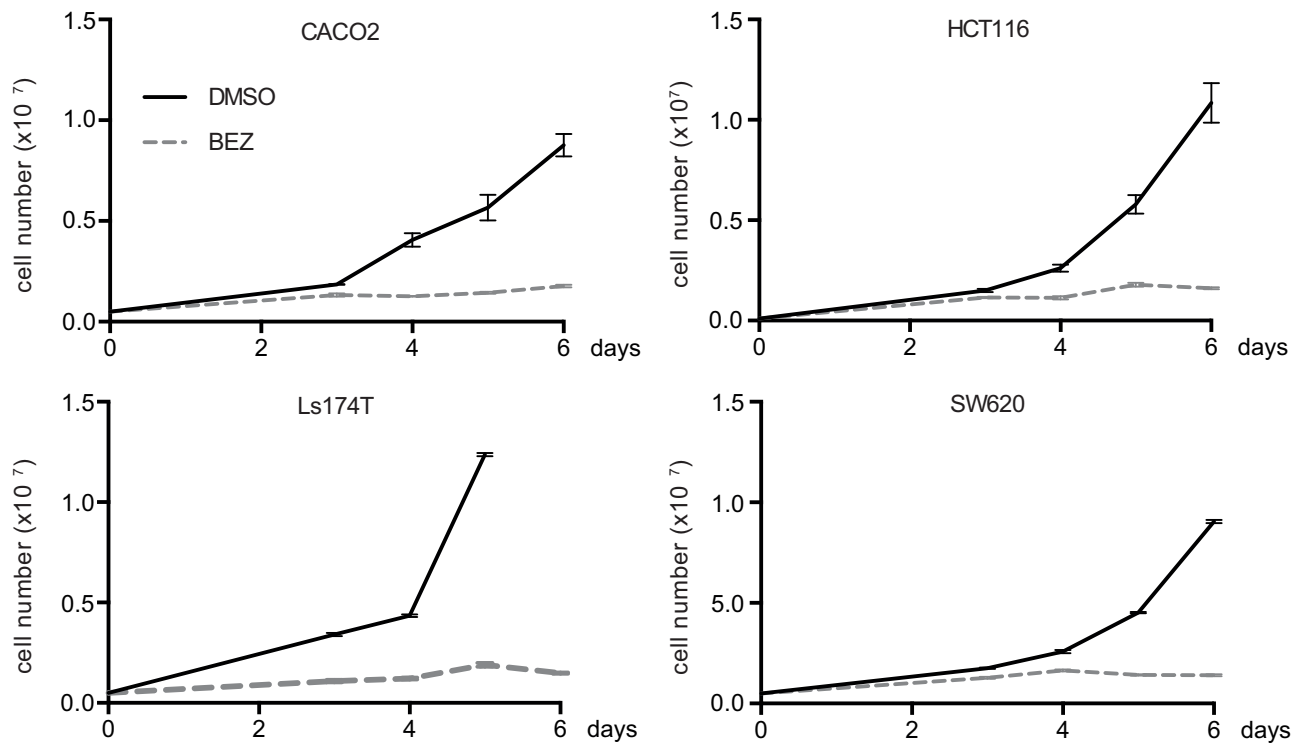

**E**

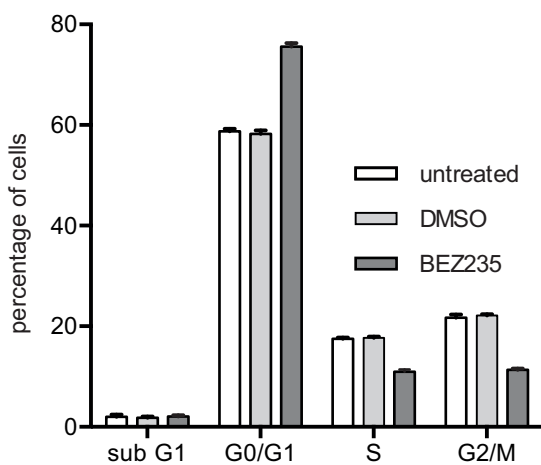

**F**

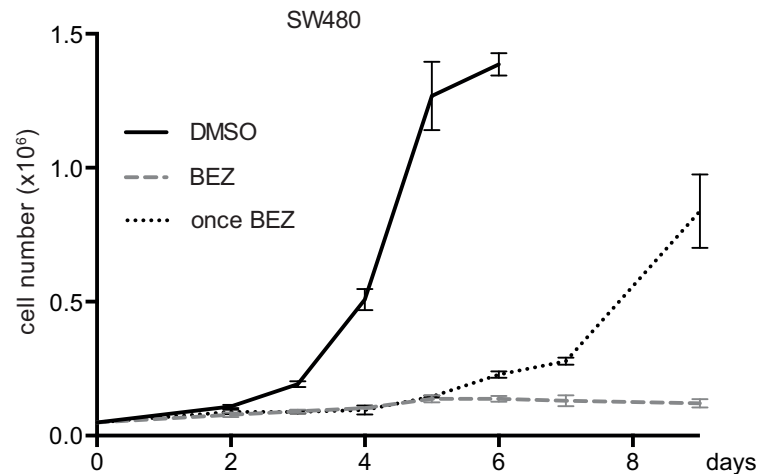

Supplement: NIHMS63345-supplement-Supplementary_figure_1.pdf [file NIHMS63345-supplement-Supplementary_figure_1.pdf]

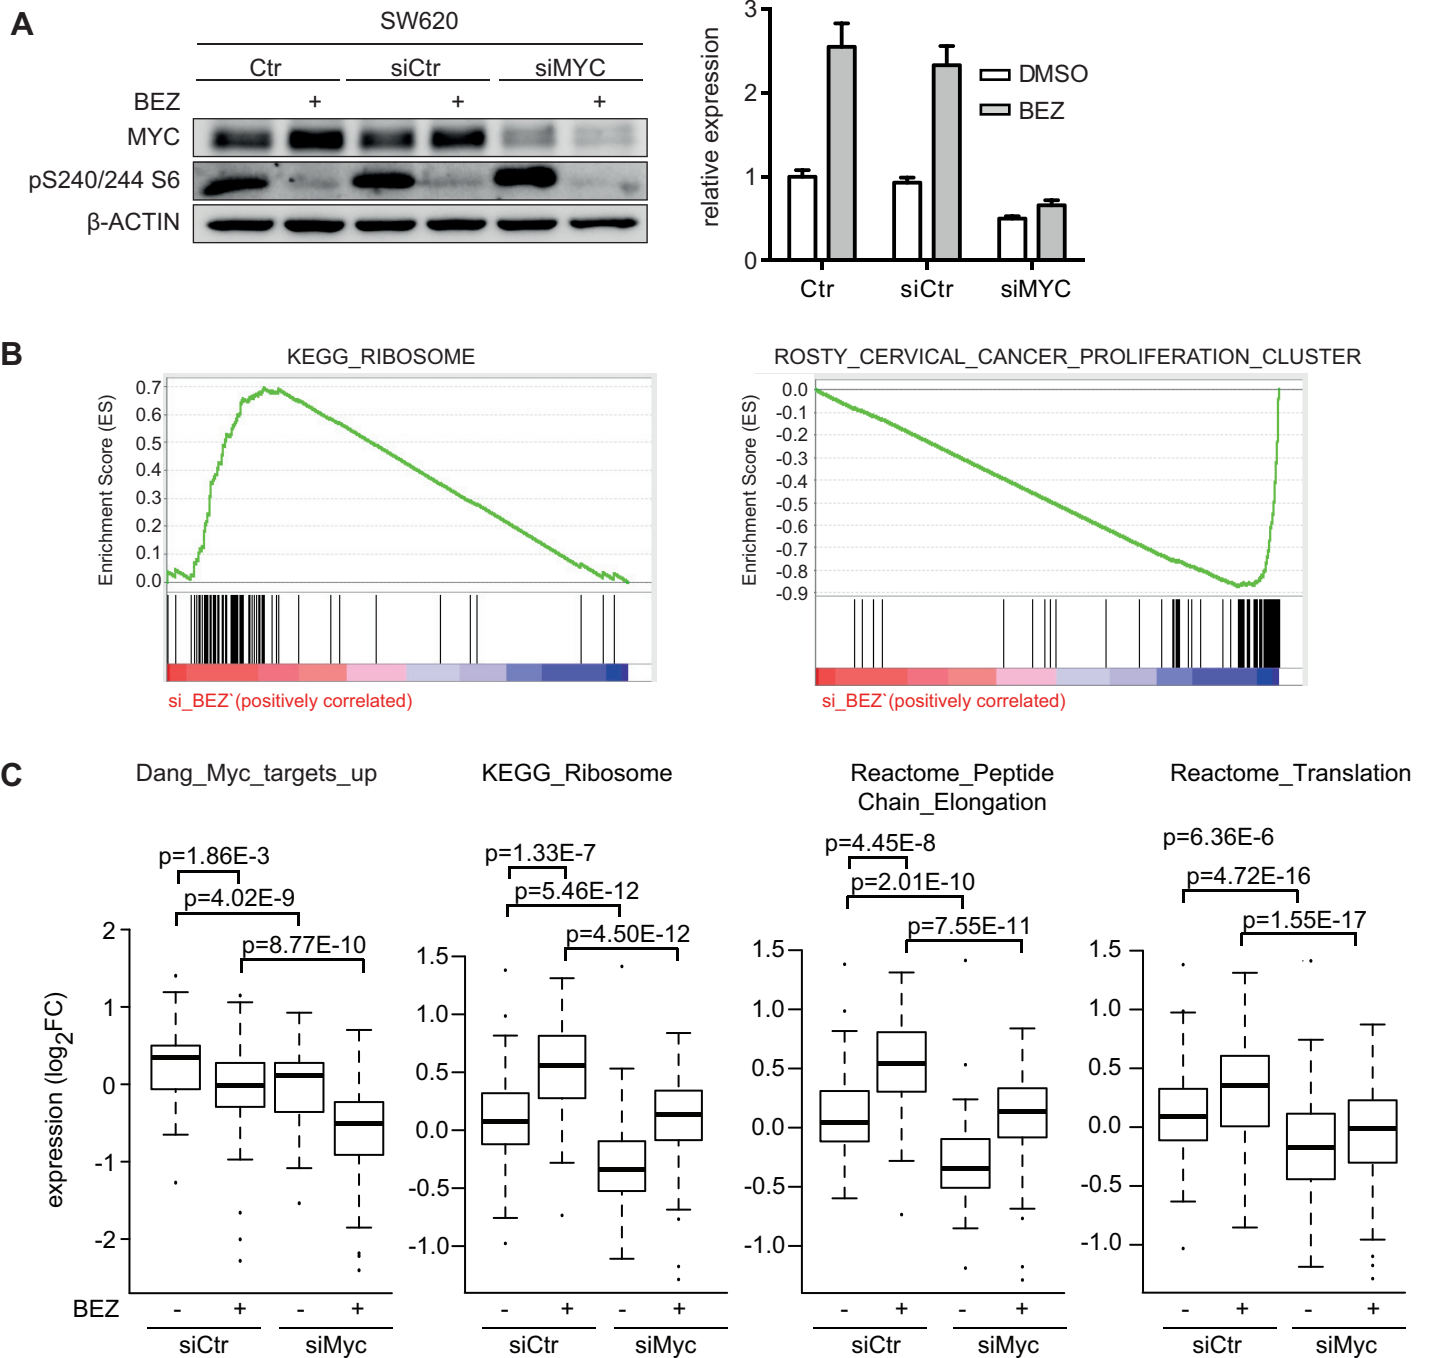

Supplement: NIHMS63345-supplement-Supplementary_figure_2.pdf [file NIHMS63345-supplement-Supplementary_figure_2.pdf]

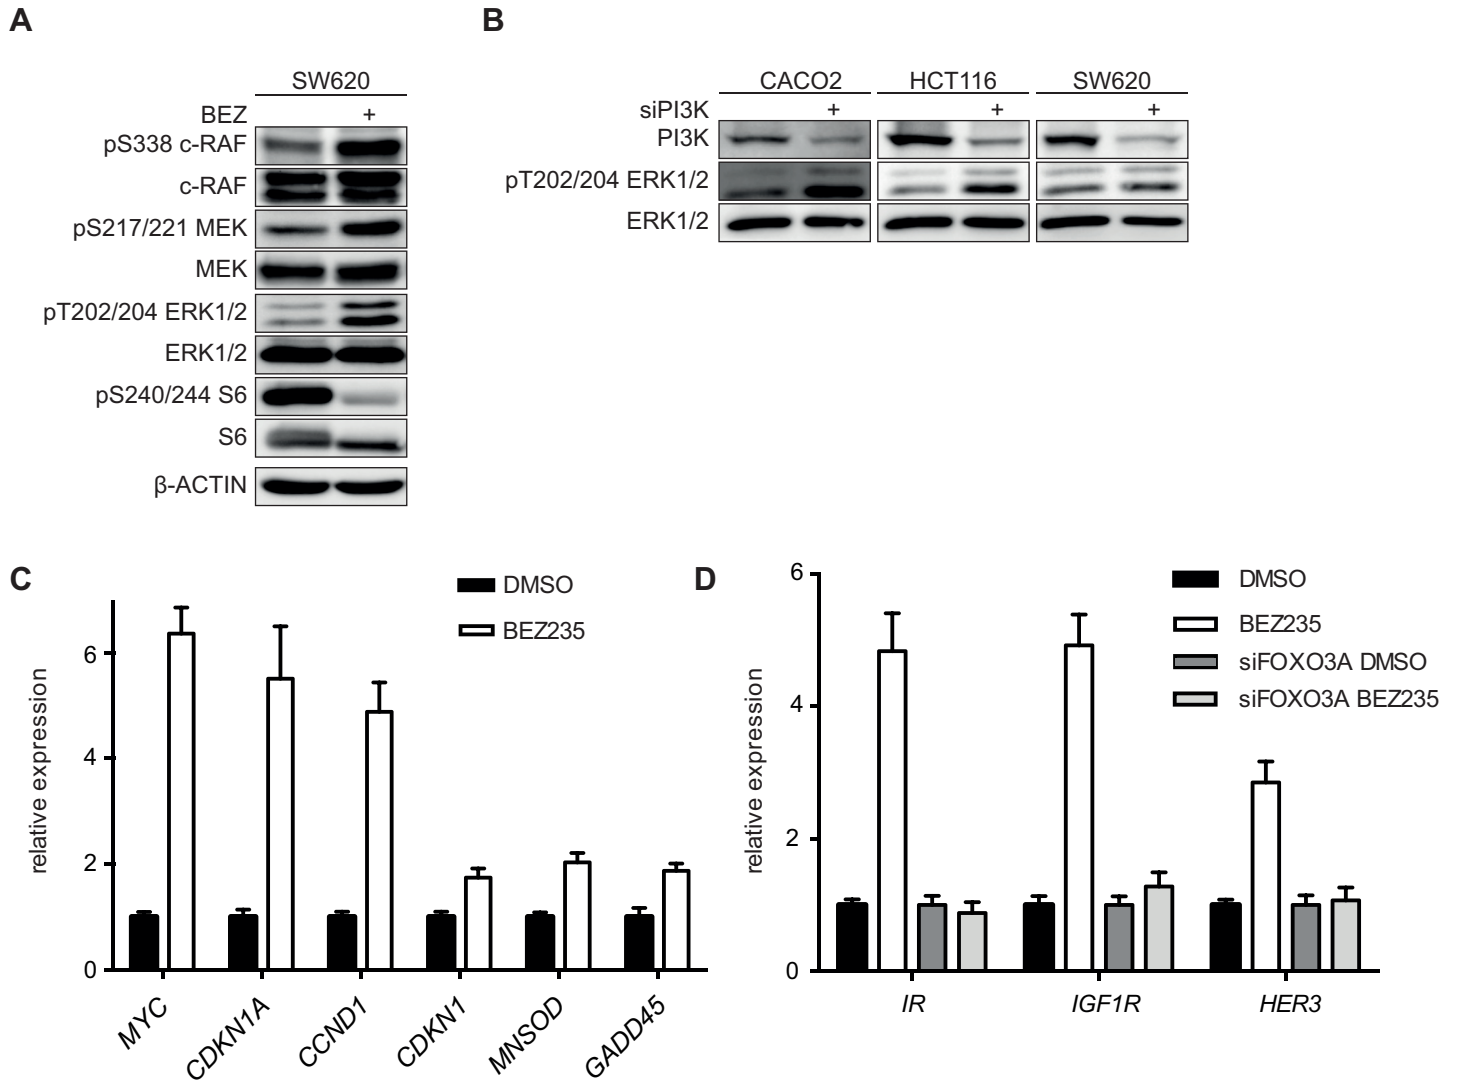

Supplement: NIHMS63345-supplement-Supplementary_figure_3.pdf [file NIHMS63345-supplement-Supplementary_figure_3.pdf]

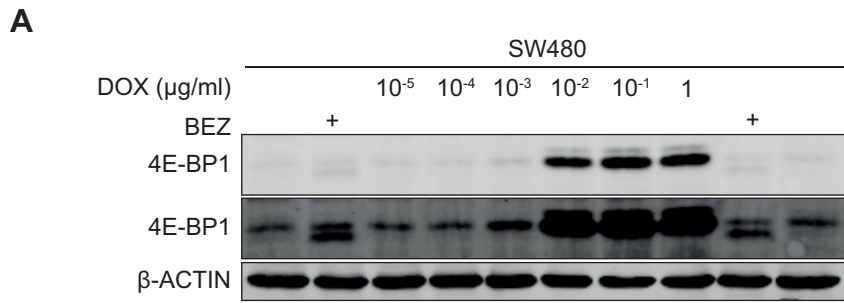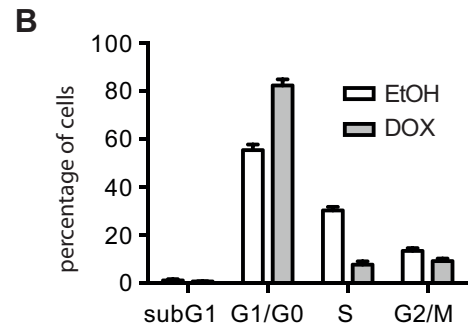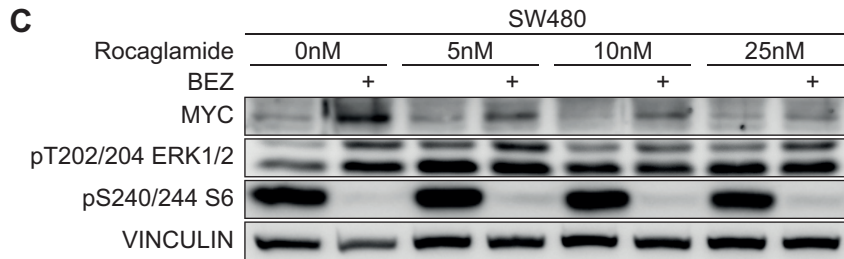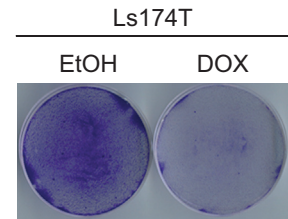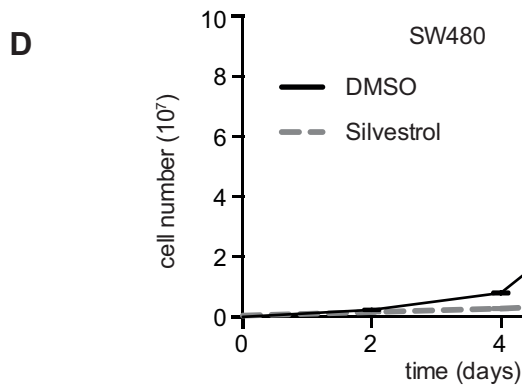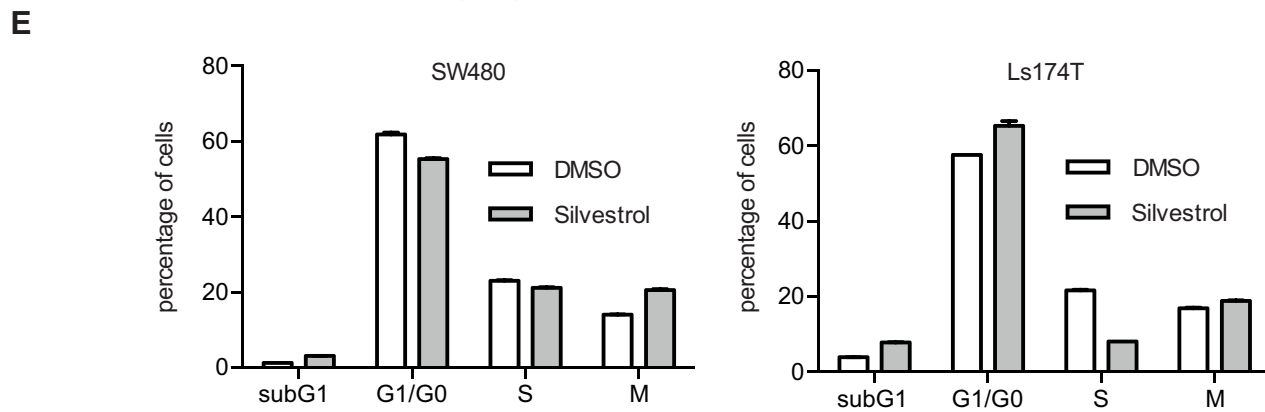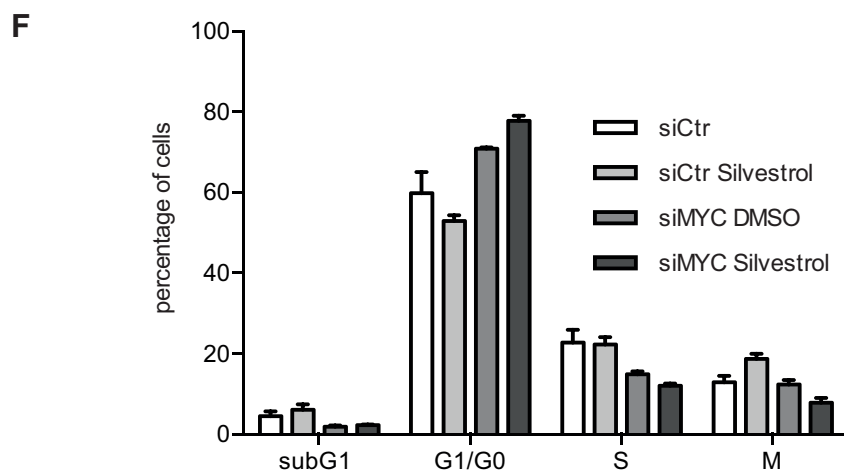

Supplement: NIHMS63345-supplement-Supplementary_figure_4.pdf [file NIHMS63345-supplement-Supplementary_figure_4.pdf]

**A**

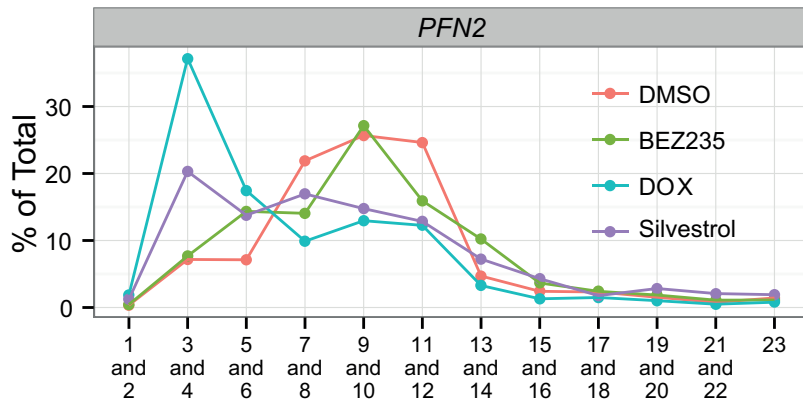

**B**

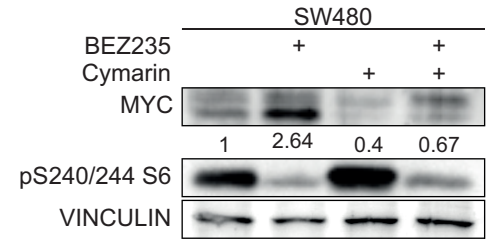

**C**

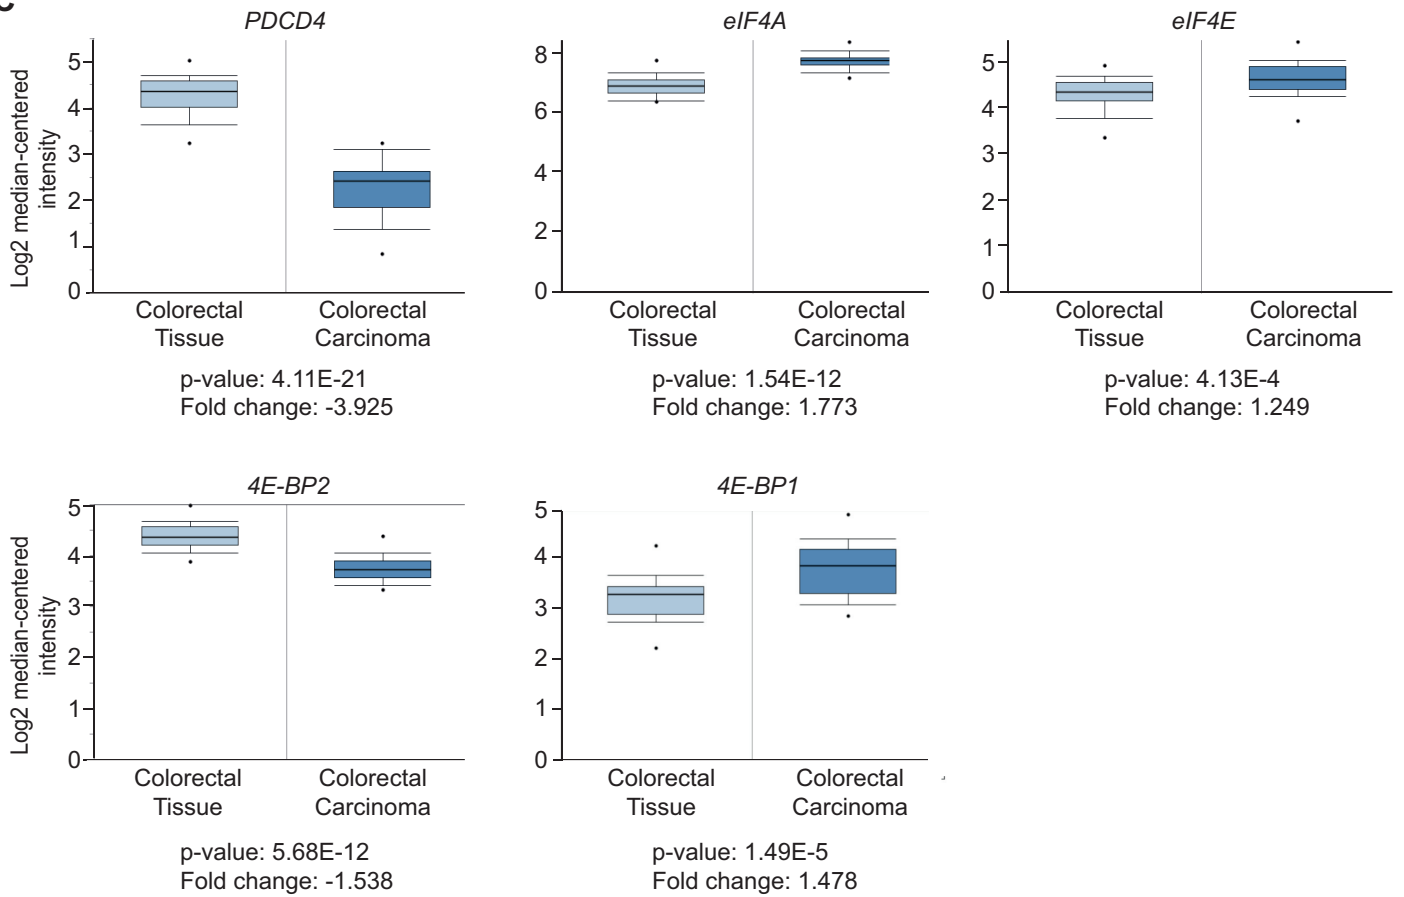

**D**

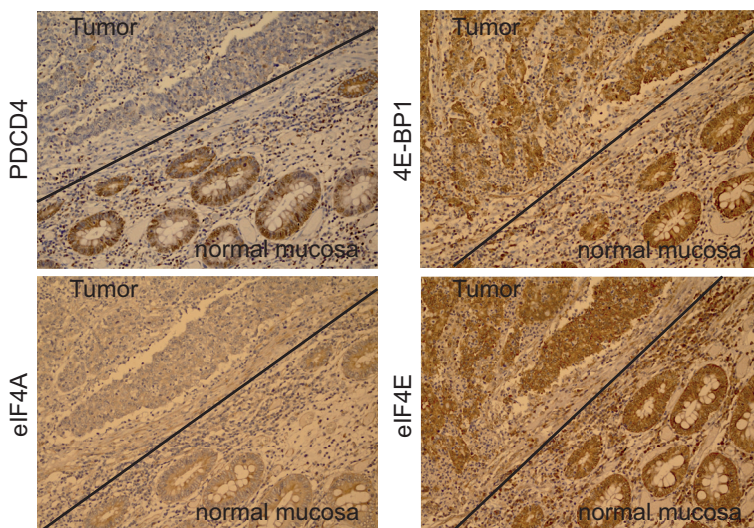

Supplement: NIHMS63345-supplement-Supplementary_figure_5.pdf [file NIHMS63345-supplement-Supplementary_figure_5.pdf]

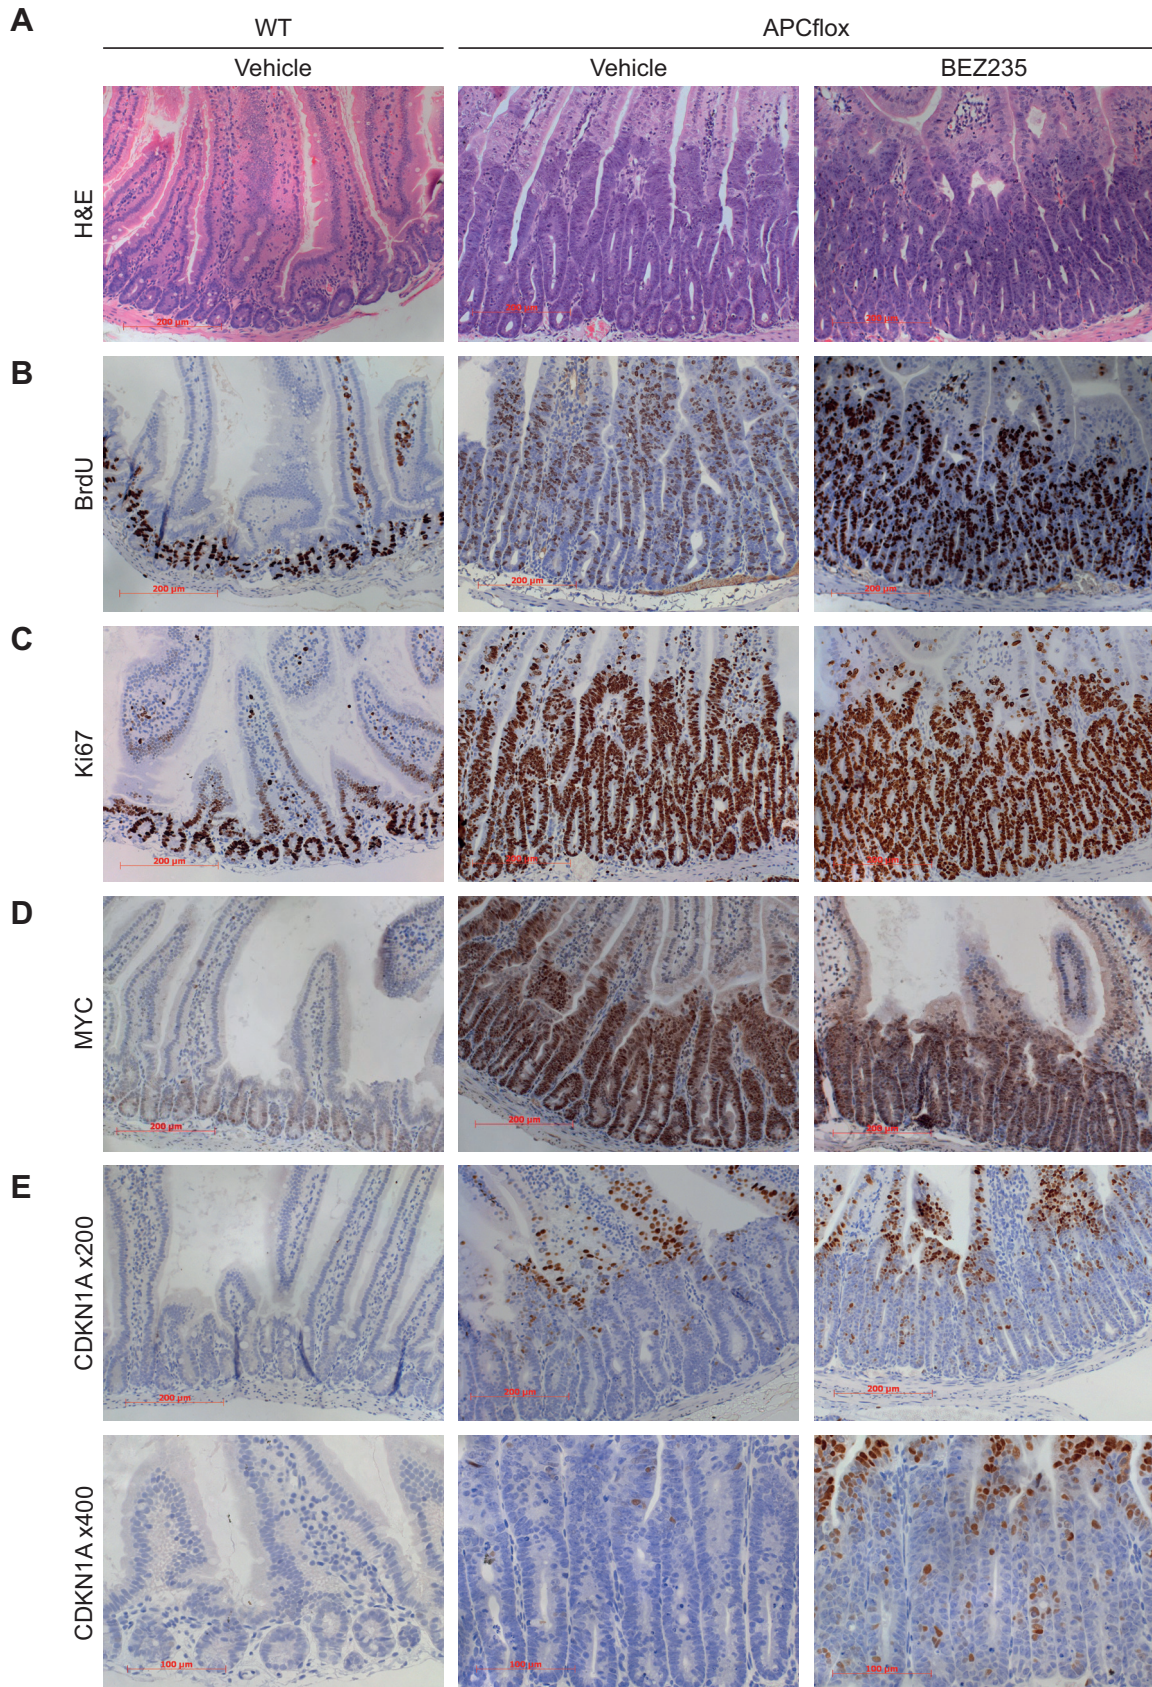

Supplement: NIHMS63345-supplement-Supplementary_figure_6.pdf [file NIHMS63345-supplement-Supplementary_figure_6.pdf]
